# Supplementary material
Source: Springer Nature journal article supplement (https://www.springermedizin.de/resource/supplementary/13020_2014_211_MOESM3_ESM.pdf/9641216)

MCF-7

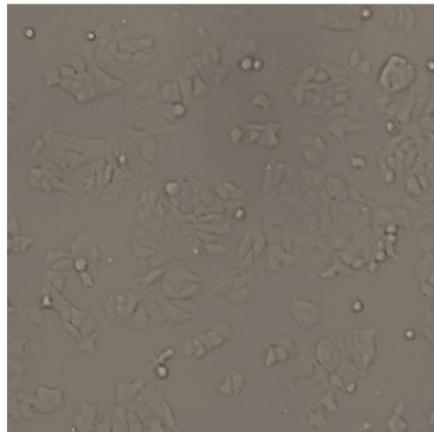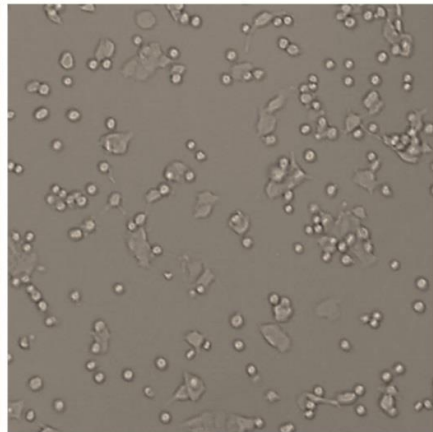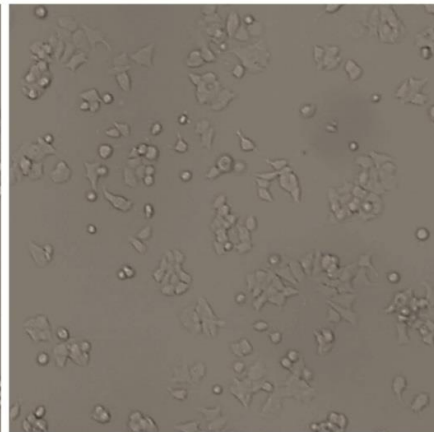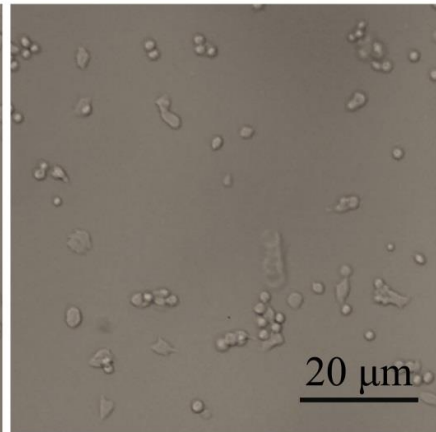

MDA-MB-231

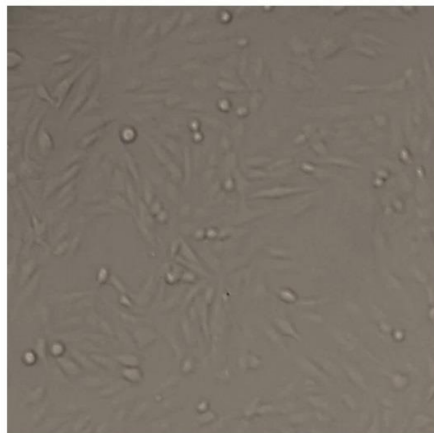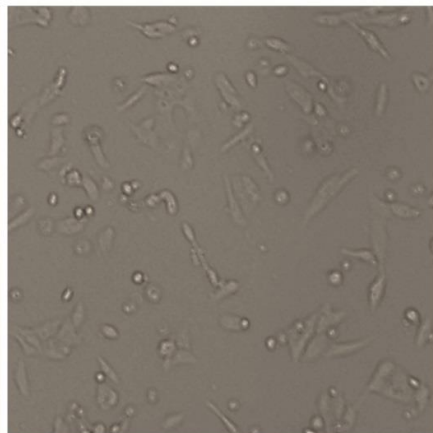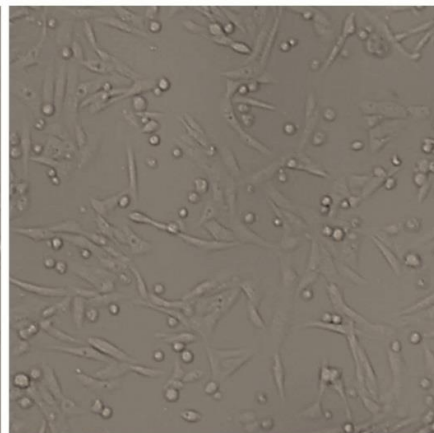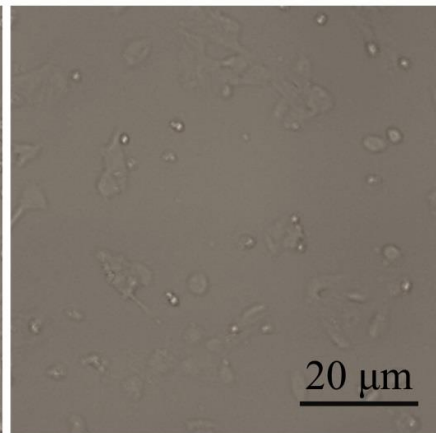

Cont

DOX

PD

DOX + PD

Supplement: MOESM3 [file 9641216]
